# Supplementary material for: Fast microwave-induced synthesis of solid cobalt hydroxide nanorods and their thermal conversion into porous cobalt oxide nanorods for efficient oxygen evolution reaction
Source: Royal Society of Chemistry journal article supplement (doi:10.1039/c9se00208a), 2019-01-01
Supplement: c9se00208a1.pdf [file c9se00208a1.pdf]

**Fast microwave-induced synthesis of solid cobalt hydroxide nanorods and  
their thermal conversion into porous cobalt oxide nanorods for efficient  
oxygen evolution reaction**

Dattatray S. Dhawale<sup>\*a</sup>, PradnyaBodhankar<sup>b</sup>, NeharaniSonawane<sup>b</sup> and Pradip B. Sarawade<sup>\*b</sup>

<sup>a</sup>Qatar Environment and Energy Research Institute (QEERI), Hamad Bin Khalifa University  
(HBKU), Qatar Foundation, P.O. Box 34110, Doha, Qatar.

<sup>b</sup>Dept. of Physics, University of Mumbai, Kalina, Mumbai-400098, India.

E-mail: [pradipsarawade@yahoo.co.in](mailto:pradipsarawade@yahoo.co.in), [dattatraydhawale@gmail.com](mailto:dattatraydhawale@gmail.com)

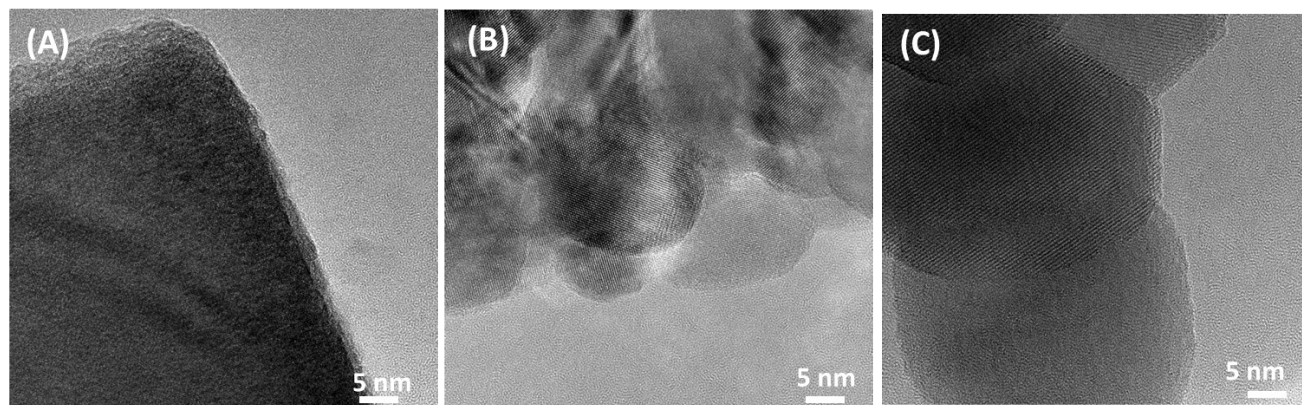

**Fig. S1** TEM images of (A)  $\text{Co(OH)}_2$  @ 120 °C, (B)  $\text{Co}_3\text{O}_4$  @ 400 °C and (C)  $\text{Co}_3\text{O}_4$  @ 600 °C.

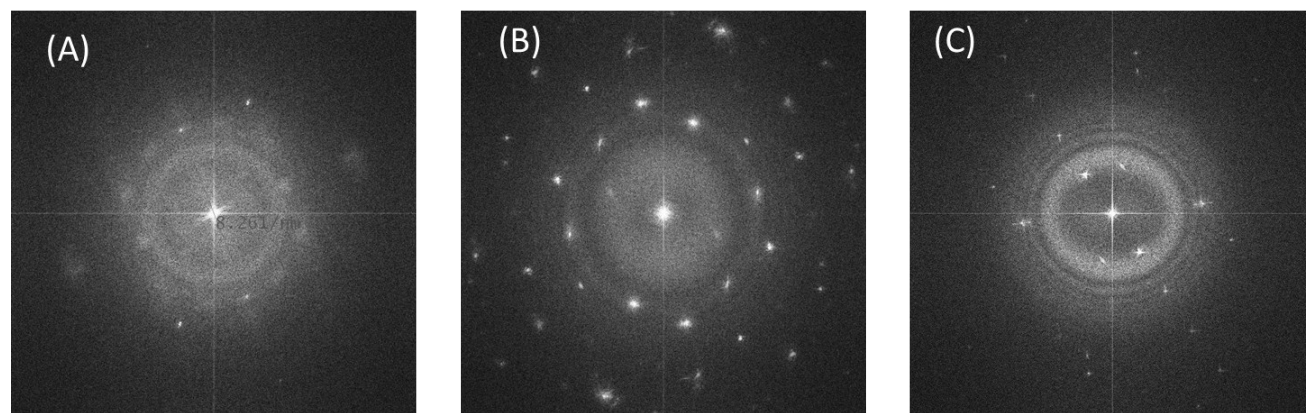

**Fig. S2** SAED patterns of ((A)  $\text{Co(OH)}_2$  @ 120 °C, (B)  $\text{Co}_3\text{O}_4$  @ 400 °C and (C)  $\text{Co}_3\text{O}_4$  @ 600 °C.

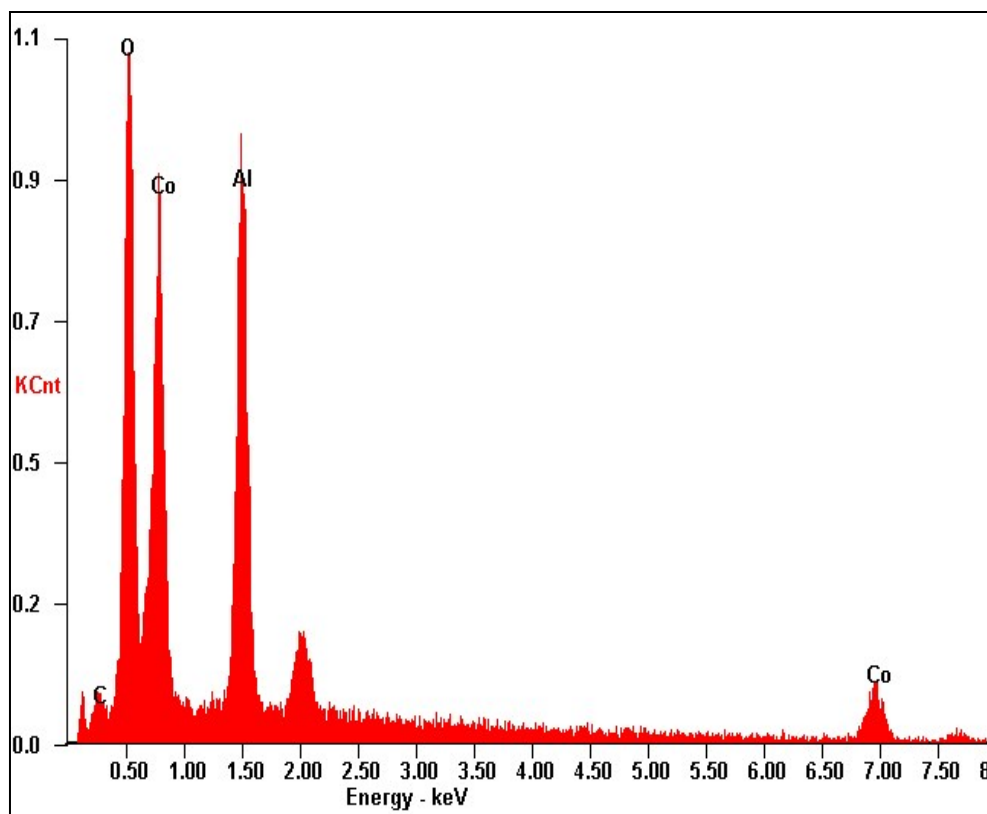

**Fig. S3** EDAX spectrum of  $\text{Co}_3\text{O}_4$  @  $600^\circ\text{C}$ .

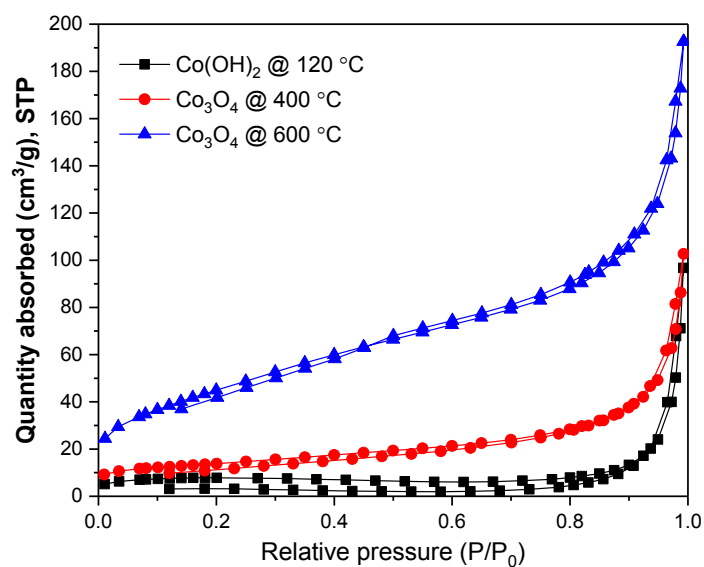

**Fig. S4** Nitrogen adsorption-desorption profiles of Co(OH)<sub>2</sub> @ 120 °C, Co<sub>3</sub>O<sub>4</sub> @ 400 °C and Co<sub>3</sub>O<sub>4</sub> @ 600 °C.

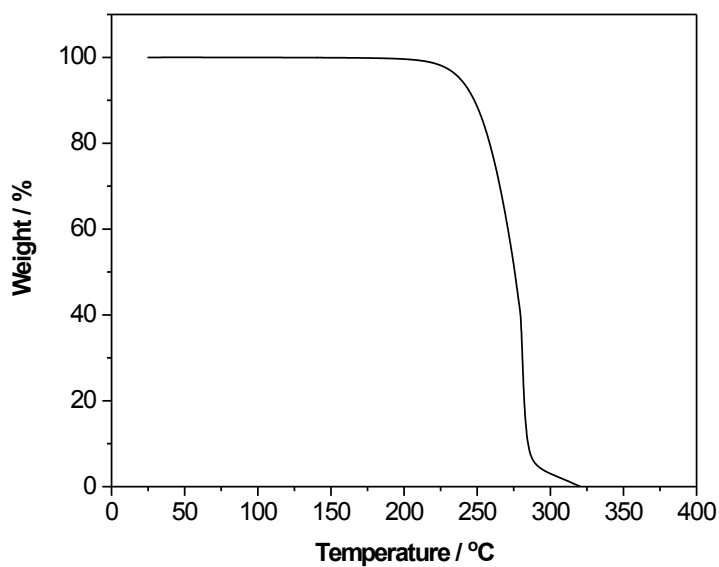

**Fig. S5** Thermogravimetric analysis (TGA) of cetyltrimethylammonium bromide (CTAB).

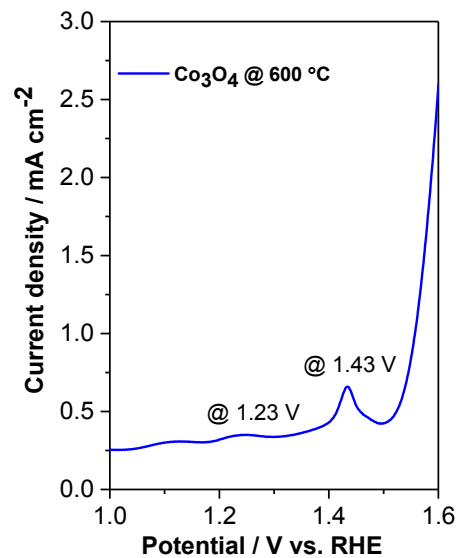

**Fig. S6** Magnified linear sweep voltammogram of  $\text{Co}_3\text{O}_4$  @  $600\text{ }^\circ\text{C}$  at  $1\text{ mV/s}$ .
